# Supplementary material
Source: PubMed Central journal article supplement (PMC3745022)
Supplement: NIHMS72322-supplement-Supplementary_Data.pdf [file NIHMS72322-supplement-Supplementary_Data.pdf]

## **Supplementary Data**

### **Resource**

**No evidence of clonally selected somatic genomic alterations in cancer associated fibroblasts from human breast and ovarian carcinomas**

Wen Qiu, Min Hu, Anita Sridhar, Ken Opeskin, Stephen Fox, Michail Shipitsin, Melanie Trivett, Ella R. Thompson, Manasa Ramakrishna, Kylie L. Goringe, Kornelia Polyak, Izhak Haviv and Ian G. Campbell

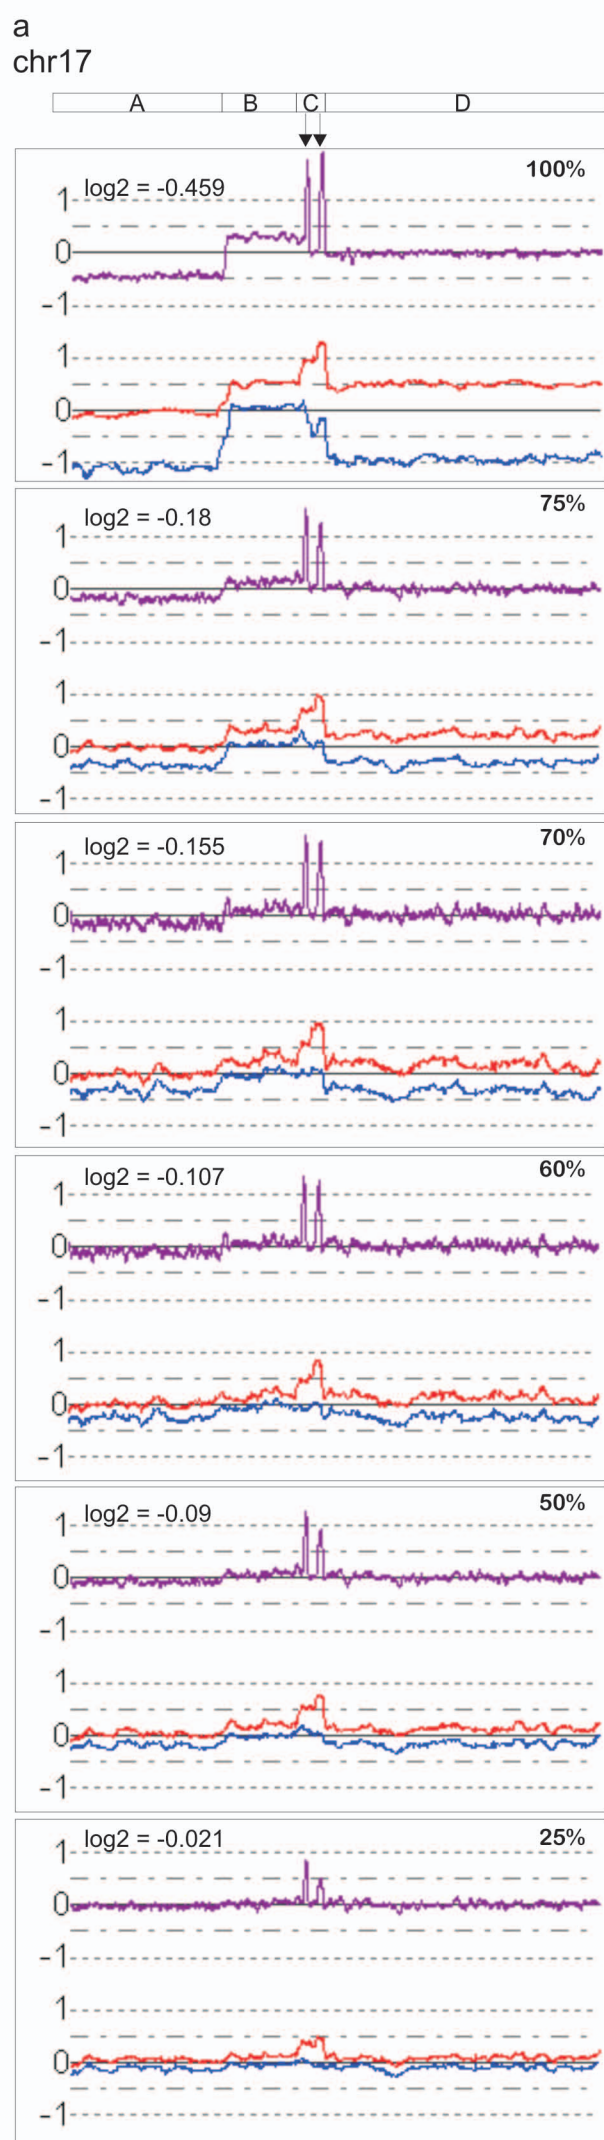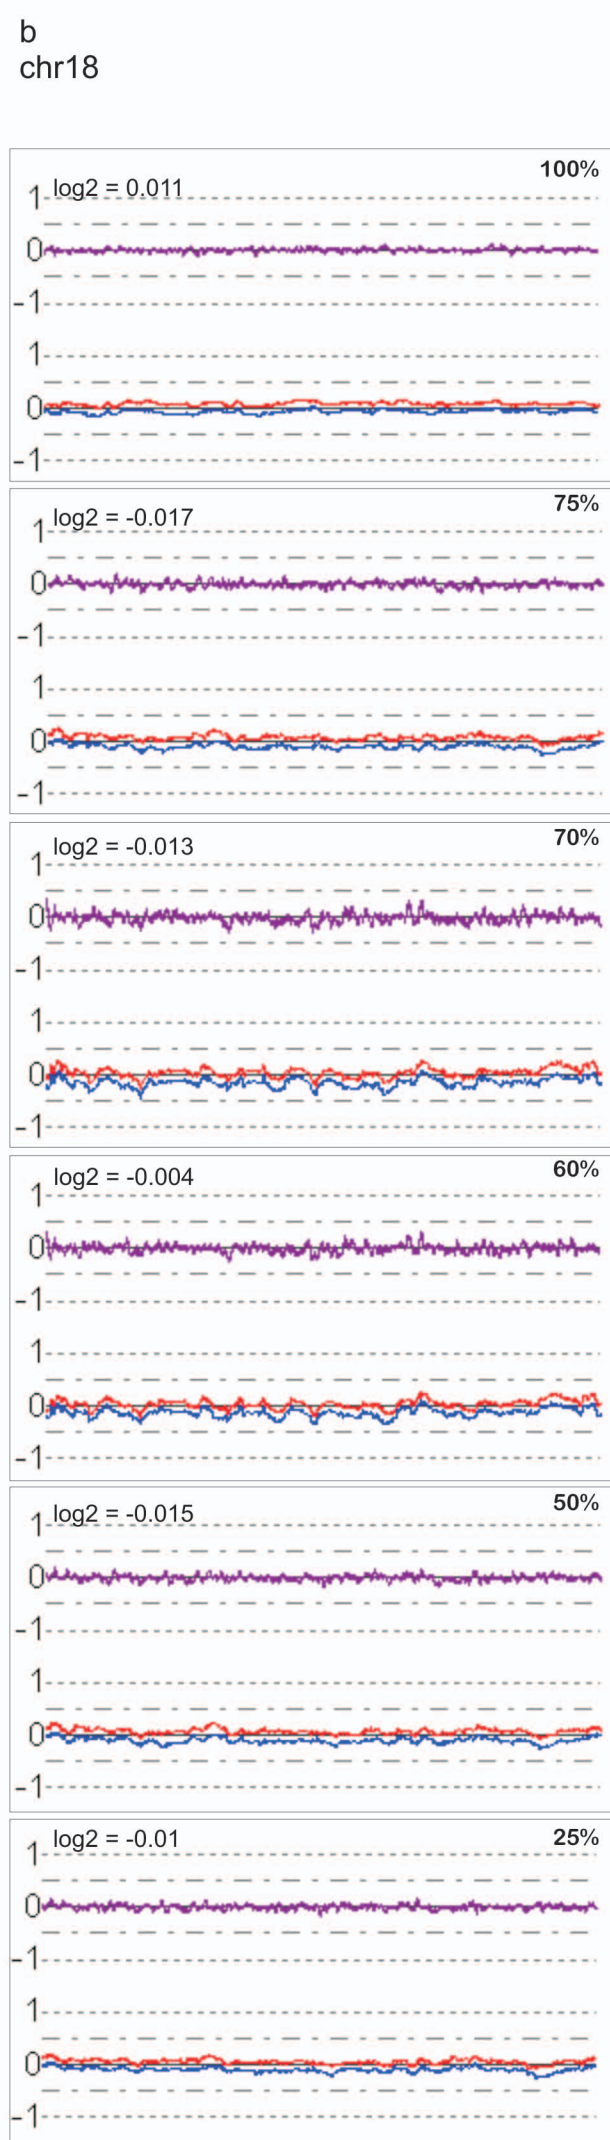

Supplementary Figure 1

**Supplementary Figure 1. Copy number and LOH plot of ovarian tumor IC257 containing varying ratios of normal DNA contamination.** The copy number and LOH plots for chromosome 17 and 18 are shown in (a) and (b), respectively. Tumor DNA for IC257 was mixed with corresponding normal DNA, in ratio of its matching normal DNA (extracted from peripheral blood lymphocytes) to prepare samples with 100%, 75%, 70%, 60%, 50% and 25% tumor DNA. The DNA was then analyzed with 250K *StyI* mapping array. As shown, tumor IC257 shows a complex pattern of LOH and copy number changes on chromosome 17 comprising a region of LOH coupled with copy number loss (region A), low level copy number gain (region B), high level copy number gain (arrows in region C) and copy number neutral LOH (region D). The  $\log_2$  copy number value across region A is shown for each sample. The copy number and LOH plot for chromosome 18 is shown for comparison as this chromosome shows no evidence of copy number loss or LOH. As expected, the mean  $\log_2$  copy number value across the chromosome 18 is close to zero for all tumor mixtures. Overall, the copy number and LOH changes on chromosome 17 observable with the 100% tumor sample are discernable at least down to 70% tumor content. For example, the high level amplification (region C) is easily observable even down to 25% tumor DNA. The copy number loss at region A is visible at 70% with a  $\log_2$  value of -0.155 compared to the  $\log_2$  value of -0.013 for the control chromosome 18. LOH across regions A and D are also discernable down to 70% tumor as evidence by the divergence of the allele specific copy number plots relative to the control chromosome 18. Purple line: 40-SNP moving average; Blue and red lines: allele-specific moving average.

a

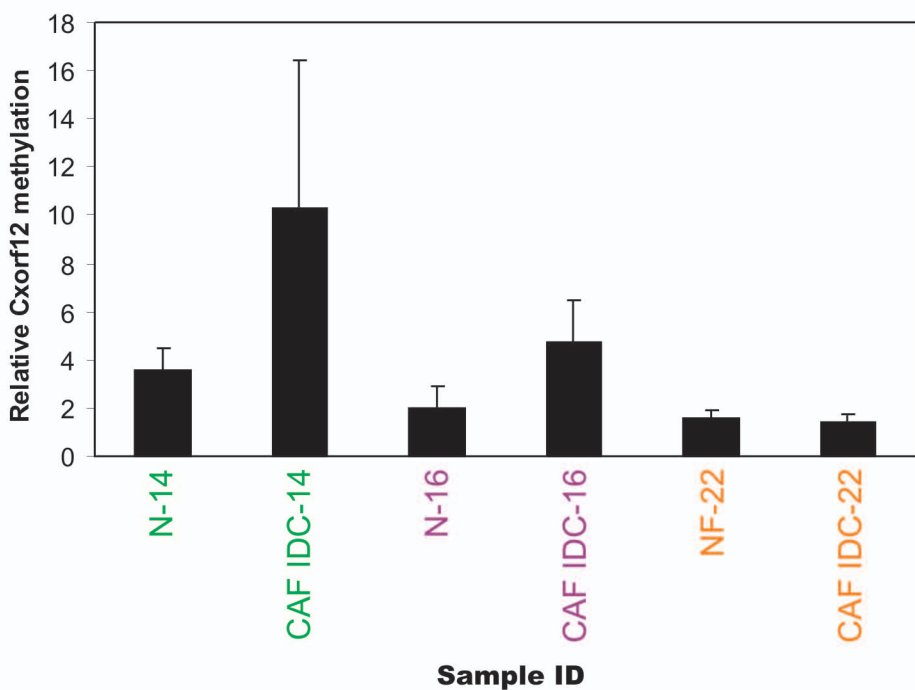

b

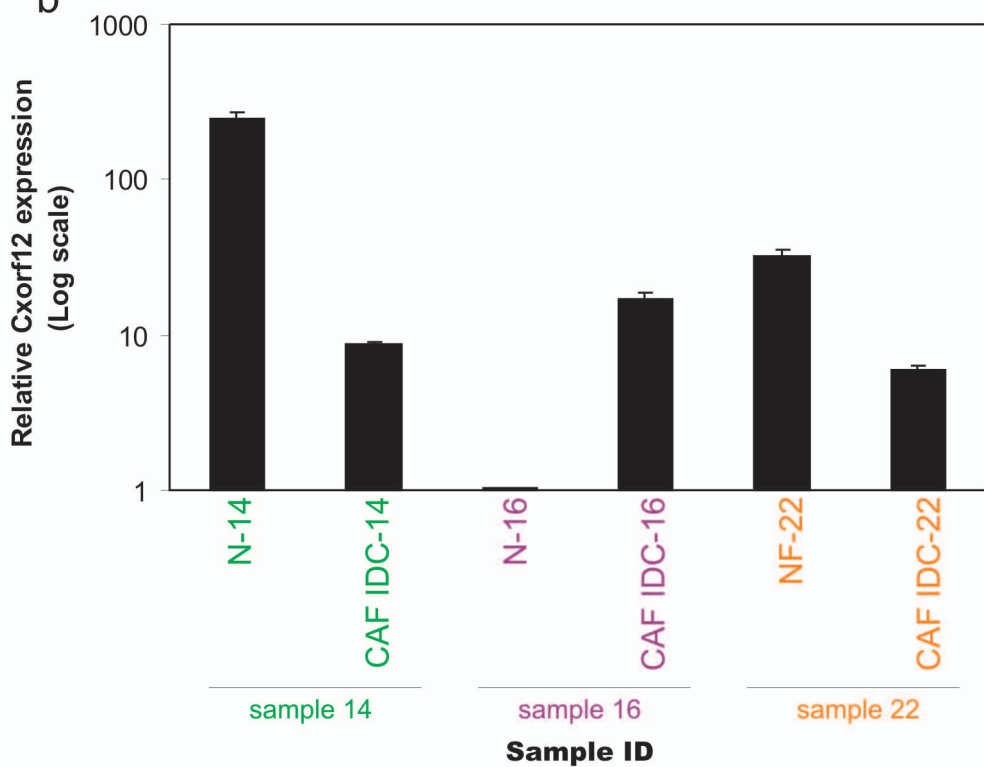

Supplementary Figure 2

**Supplementary Figure 2. qMSP and qRT-PCR analyses of three CAFs cultures that were tested in xenograft assays.** (a) qMSP analysis of *Cxorf12* using bisulfate treated genomic DNA from the indicated samples. Each sample was analyzed in triplicate in one single experiment. Relative methylation levels normalized to *ACTB* ( $\beta$ -actin) are indicated on the y-axis. The error bar represents the variation of *Cxorf12* methylation between the triplicates of each sample, normalized to the average *ACTB* expression. (b) qRT-PCR analysis of *Cxorf12* in RNA prepared from the indicated samples. Each sample was analyzed in triplicate in one single experiment. Relative expression levels normalized to *RPL39* are indicated on the y-axis in logarithmic scale. The error bar represents the variation of *Cxorf12* expression between the triplicates of each sample, normalized to the average RPL39 expression. N: Normal bulk breast tissue; CAF: Cancer associated fibroblast culture; NF: Normal fibroblast culture. The qMSP and qRT-PCR results of each indicated sample is summarized in **Supplementary Table 3**.

**Supplementary Table 1. Clinicopathological characteristics of ovarian cancers analyzed**

| Sample       | Tumor subtype            | Age                | Grade              | Stage                        | % of fibroblasts                               |
|--------------|--------------------------|--------------------|--------------------|------------------------------|------------------------------------------------|
| 32           | serous                   | 71                 | 1                  | 2                            | 85                                             |
| 121          | mucinous                 | 77                 | 1                  | 3                            | 80                                             |
| 128          | endometrioid             | 56                 | 2                  | 1c                           | 95                                             |
| 131          | serous                   | 74                 | 3                  | 3                            | 80                                             |
| 135          | serous                   | 66                 | 2                  | 2                            | 90                                             |
| 138          | mucinous                 | 47                 | 1                  | 1a                           | 80                                             |
| 141          | serous                   | 56                 | 3                  | 3c                           | 90                                             |
| 151          | endometrioid             | 56                 | 2                  | 2c                           | 60                                             |
| 277          | serous                   | 71                 | 3                  | 3c                           | 80                                             |
| 281          | serous                   | 48                 | 2                  | 3b                           | 50                                             |
| 292          | mucinous                 | 80                 | 2                  | 3                            | 95                                             |
| 293          | endometrioid             | 59                 | 3                  | 1                            | 75                                             |
| 300          | endometrioid             | 68                 | 3                  | 3                            | 80                                             |
| 307          | endometrioid             | 57                 | 3                  |                              | 90                                             |
| 315          | serous                   | 82                 | 3                  |                              | 50                                             |
| 318          | serous                   | 70                 | 3                  | 3                            | 90                                             |
| 323          | serous                   | 54                 | 2                  |                              | 60                                             |
| 374          | endometrioid             | 80                 | 2                  | 3                            | 85                                             |
| 400          | mucinous                 | 66                 | 1                  | 3                            | 40                                             |
| 406          | serous                   | 76                 | 3                  |                              | 70                                             |
| 477          | serous                   | 71                 | 3                  | 3                            | 75                                             |
| 509          | serous                   | 66                 | 2                  | 3                            | 85                                             |
| 533          | endometrioid             | 87                 | 3                  | 4                            | 80                                             |
| 551          | serous                   | 55                 | 3                  | 3                            | 80                                             |
| 565          | serous                   | 63                 | 2                  | 2                            | 85                                             |
|              | <b>Number of samples</b> | <b>average age</b> | <b>Grade 1/2/3</b> | <b>Stage 1/2/3/4/unknown</b> | <b>Number of samples with ≥70% Fibroblasts</b> |
| serous       | 14                       | 65.9               | 1/5/8              | 0/3/8/0/3                    | 10                                             |
| endometrioid | 7                        | 66.1               | 0/3/4              | 2/1/2/1/1                    | 7                                              |
| mucinous     | 4                        | 67.5               | 3/1/0              | 1/0/3/0/0                    | 3                                              |
| All types    | 25                       | 66.5               | 4/9/12             | 3/4/13/1/4                   | 20                                             |

**Supplementary Table 2. Clinicopathological characteristics of breast cancers analyzed**

| <b>Sample</b> | <b>Morphology</b>           | <b>Age</b>         | <b>Grade</b>                  | <b>Stage</b>               | <b>% of fibroblasts</b>                                |
|---------------|-----------------------------|--------------------|-------------------------------|----------------------------|--------------------------------------------------------|
| RMH06-204     | Infiltrating duct carcinoma | 60                 | 3                             |                            | 75                                                     |
| 7697          | DCIS                        | 82                 | 0                             | 0                          | 80                                                     |
| 7187          | Infiltrating duct carcinoma | 50                 | 3                             | 2b                         | 95                                                     |
| 5077          | Medullary carcinoma         | 60                 | 3                             | 2a                         | 95                                                     |
| 1955          | Infiltrating duct carcinoma | 53                 | 3                             | 2a                         | 80                                                     |
| 8001          | Ductal carcinoma            | 34                 | 2                             | 2a                         | 85                                                     |
| 7731          | Ductal carcinoma            | 39                 | 3                             | 2b                         | 90                                                     |
| 2274          | Infiltrating duct carcinoma | 70                 | 2                             | 2a                         | 90                                                     |
| 1001          | Mucinous adenocarcinoma     | 92                 | 9                             | 2a                         | 85                                                     |
| 1539          | Infiltrating duct carcinoma | 51                 | 3                             | 2b                         | 75                                                     |
|               | <b>Number of samples</b>    | <b>average age</b> | <b>Grade<br/>2/3/9unknown</b> | <b>Stage<br/>2/unknown</b> | <b>Number of<br/>samples with<br/>≥75% Fibroblasts</b> |
| All types     | 10                          | 59.1               | 2/6/1/1                       | 8/2                        | 10                                                     |

**Supplementary Table 3. Source and relevant properties of CAF cultures analyzed in the paper**

| CAF ID       | tissue source                                    | xenograft assay results <sup>§</sup>                                                      | Cxorfl2 qMSP of cultured stroma                                                                           | Cxorfl2 qRT-PCR of cultured stroma                                                               |
|--------------|--------------------------------------------------|-------------------------------------------------------------------------------------------|-----------------------------------------------------------------------------------------------------------|--------------------------------------------------------------------------------------------------|
| CAF IDC-14   | invasive ductal breast carcinoma, ER+/PR+/HER2-  | tested twice, promoted tumor growth                                                       | hypermethylated compared to matched normal bulk breast                                                    | lower level compared to matched normal bulk breast                                               |
| CAF IDC-16   | invasive ductal breast carcinoma, ER-/PR-/HER2+  | tested twice, promoted tumor growth-but less efficiently than the other two               | hypermethylated compared to matched normal bulk breast                                                    | low level, but no matching normal fibroblast to compare, Little expression in normal bulk breast |
| CAF IDC-1819 | invasive ductal breast carcinoma, ER+/PR+/HER2-  | not tested                                                                                | hypomethylated, but no matching normal to compare                                                         | modest level, but no matching normal to compare                                                  |
| CAF IDC-22   | invasive ductal breast carcinoma, ER-/PR-/HER2-  | tested twice, promoted tumor growth                                                       | hypomethylated compared to matched normal bulk breast, no significant difference to matched normal stroma | lower level compared to matched normal stroma                                                    |
| CAF IDC-24   | invasive ductal breast carcinoma                 | not tested                                                                                | slightly hypomethylated compared to matched normal stroma, no significant difference to matched blood     | lower level compared to matched normal stroma                                                    |
| CAF IDC-34   | invasive lobular breast carcinoma, ER+/PR-/HER2- | not tested                                                                                | hypomethylated compared to matched normal bulk breast                                                     | lower level compared to matched normal bulk breast                                               |
| NR-1         | invasive ductal breast carcinoma                 | tested four times, promoted tumor growth four to five fold over normal fibroblast culture | not tested                                                                                                | not tested                                                                                       |



§ Full details of the xenograft assay for CAF IDC 14, 16, 1819, 22, 24 and 34 are reported in M. Hu et al.

**REGULATION OF *IN SITU* TO INVASIVE BREAST CARCINOMA TRANSITION**

Min Hu, Jun Yao, Danielle K. Carroll, Stanislaw Weremowicz, Haiyan Chen,  
Daniel Carrasco, Andrea Richardson, Shelia Violette, Tatiana Nikolskaya, Yuri  
Nikolsky, Erica L. Bauerlein, William C. Hahn, Rebecca S. Gelman, Craig Allred,  
Mina J. Bissell, Stuart Schnitt, Kornelia Polyak.

**(Cancer Cell, In press)**

Xenograft assay data for NR-1 are from unpublished observation, by I. Haviv et al.

### Supplementary Table 4. Primer sequences used in the paper

Chromosome 22 microsatellite markers (MSMs) (Figure 4d)

| MSM             |           | Primer sequence 5'-3' | Annealing °C |
|-----------------|-----------|-----------------------|--------------|
| <b>D22S1169</b> | <b>s</b>  | GCACACACATGCACATAATC  | 49           |
|                 | <b>as</b> | AACAACCTCCAGCAGACG    |              |
| <b>D22S1174</b> | <b>s</b>  | GAATCACTAGGGGCCTTCA   | 49           |
|                 | <b>as</b> | TGAGGCTATGTGCCAG      |              |

MSMs (Figure 6)

| MSM             |           | Primer sequence 5'-3'     | Annealing °C |
|-----------------|-----------|---------------------------|--------------|
| <b>D3S1613</b>  | <b>s</b>  | TGTGATAAGGACCAAGGC        | 55           |
|                 | <b>as</b> | GAGCAAATTGCAGAAATGAG      |              |
| <b>D3S3640</b>  | <b>s</b>  | GATCGCGTGACATTCC          | 55           |
|                 | <b>as</b> | TGCTACTTGCTATTTATCAGACC   |              |
| <b>D3S1744</b>  | <b>s</b>  | TTTAAGCGGAAGGAAGTGTG      | 55           |
|                 | <b>as</b> | CTGGCCCCATCTCTCTAT        |              |
| <b>D11S1999</b> | <b>s</b>  | TACATGGCAGCAGGCATATA      | 55           |
|                 | <b>as</b> | GAGTAAACAAGATTGCTAGATAGGC |              |
| <b>D11S2365</b> | <b>s</b>  | TTCACATGCATATGTCTTTATGG   | 55           |
|                 | <b>as</b> | CTGTCTAGTGCCTGAGCTGC      |              |
| <b>D11S2002</b> | <b>s</b>  | CATGGCCCTTCTTTTCATAG      | 55           |
|                 | <b>as</b> | AATGAGGTCTTACTTTGTTGCC    |              |

qMSP primer (Supplementary Figure 2a)

| Gene                  |           | Primer sequence 5'-3' | Annealing °C |
|-----------------------|-----------|-----------------------|--------------|
| <b><i>Cxorf12</i></b> | <b>s</b>  | GTCGGCGTTGTCGCGC      | 61           |
|                       | <b>as</b> | CGAAAACGTAAAACTCGCCCG | 57.1         |

RT-PCR primer (Supplementary Figure 2b)

| Gene                  |           | Primer sequence 5'-3' | Annealing °C |
|-----------------------|-----------|-----------------------|--------------|
| <b><i>Cxorf12</i></b> | <b>s</b>  | ACCTGCTGAAAACCGATGAC  | 55.5         |
|                       | <b>as</b> | CTCAGGAAAGGGCAGTCTTG  | 55.6         |
